# Supplementary material for: German Cockroach Extract Induces Matrix Metalloproteinase-1 Expression, Leading to Tight Junction Disruption in Human Airway Epithelial Cells
Source: PubMed Central journal article supplement — Yonsei Med J. 2018 Nov 15;59(10):1222–31. doi: 10.3349/ymj.2018.59.10.1222 (PMC6240571; doi:10.3349/ymj.2018.59.10.1222), 2018-11-15
Supplement: ymj-59-1222-s001.pdf [file ymj-59-1222-s001.pdf]

**Supplementary Table 1.** List of Real-Time PCR Primers Used in This Study

| <b>Gene</b>     | <b>Forward primer (5'-3')</b> | <b>Reverse primer (5'-3')</b> |
|-----------------|-------------------------------|-------------------------------|
| <i>MMP-1</i>    | AAAATTACAGCCAGATTTGCC         | GGTGTGACATTACTCCAGAGTTG       |
| <i>MMP-9</i>    | TGTACCGCTATGGTTACACTCG        | GGCAGGGACAGTTGCTTCT           |
| <i>TIMP-1</i>   | ACCACCTTATACCAGCGTTATGA       | GGTGTAGACGAACCGGATGTC         |
| <i>Occludin</i> | AGCAGCGGTGGTAACTTTG           | AGTTGTGTAGTCTGTCTCATAGTG      |
| <i>ZO-1</i>     | AAACAAGCCAGCAGAGACC           | CGCAGACGATGTCATAGTTTC         |
| <i>Ets-1</i>    | CTGCGCCCTGGGTAAAGA            | CCCATAAGATGTCCCAACAA          |
| <i>Sp-1</i>     | TTGAAAAAGGAGTTGGTGGC          | TGCTGGTTCTGTAAGTTGGG          |
| <i>NF-κB</i>    | ATGGCTTCTATGAGGCTAGA          | GTTGTTGTTGGTCTGGATGC          |
| <i>c-Fos</i>    | AGAATCCGAAGGAAAGGAA           | CTTCTCCTTCAGCAGGTTGG          |
| <i>c-Jun</i>    | CAGGTGGCACAGCTTAAACA          | GTTTGCAACTGCTGCGTTAG          |
