# Supplementary material for: German Cockroach Extract Induces Matrix Metalloproteinase-1 Expression, Leading to Tight Junction Disruption in Human Airway Epithelial Cells
Source: PubMed Central journal article supplement — Yonsei Med J. 2018 Nov 15;59(10):1222–31. doi: 10.3349/ymj.2018.59.10.1222 (PMC6240571; doi:10.3349/ymj.2018.59.10.1222), 2018-11-15
Supplement: ymj-59-1222-s002.pdf [file ymj-59-1222-s002.pdf]

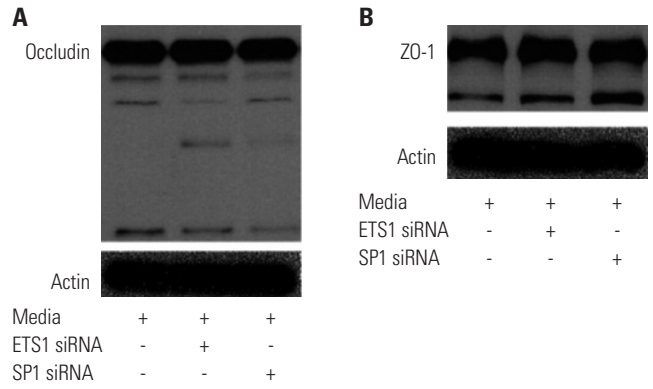

**Supplementary Fig. 1.** Occludin (A) and ZO-1 (B) protein probed with anti-occludin and ZO-1 in cells transiently transfected with ETS1 and SP1 siRNA cultured in media only without German cockroach extract treatment. Images are representative of three individual experiments. ZO, zonula occludens; siRNA, small interfering RNA.
